# Supplementary material for: Pillar[5]arene-functionalized paper as a fluorescent sensor for cyanide ions in water
Source: Royal Society of Chemistry journal article supplement (doi:10.1039/c9nj02062d), 2019-01-01
Supplement: c9nj02062d1.pdf [file c9nj02062d1.pdf]

## *Electronic Supplementary Information*

Pillar[5]arene-functionalized paper as fluorescent sensor for cyanide ion in water  
Ganlin Hu, Chunxin Yang, Hui Liu<sup>a,\*</sup> and Jianming Shen<sup>b</sup>

<sup>a</sup>Key Laboratory for Green Chemical Process of Ministry of Education, School of  
Chemical Engineering & Pharmacy, Wuhan Institute of Technology, 693 Xiongchu  
Avenue, Wuhan 430073, P. R. China.

<sup>b</sup>Chibi Environmental Protection Agency, 121 Yingli Street, Chibi 437300, P. R. China.

### **Table of Contents**

|                                                                    |     |
|--------------------------------------------------------------------|-----|
| Experimental section .....                                         | S2  |
| Synthesis and characterization of P5N and FI.....                  | S2  |
| Procedure for preparation of functionalized paper.....             | S9  |
| UV-Vis titration of P5N.....                                       | S10 |
| XPS spectra of functionalized paper.....                           | S11 |
| Plot of fluorescence intensity as a function of concentration..... | S12 |
| Functionalized paper in a series of anions.....                    | S12 |
| Fluorescence emission of FI and P5N with cyanide.....              | S13 |

## Experimental Section

Unless otherwise indicated, all starting materials were obtained from commercial suppliers and were used without further purification. Melting points are uncorrected. All reactions were performed under an atmosphere of dry nitrogen. NMR spectra were recorded on Bruker 400 MHz spectrometer in the indicated solvents. Chemical shifts are expressed in parts per million ( $\delta$ ) using residual solvent protons as internal standards. ESI mass spectroscopy was performed on a Thermo Scientific LTQ XL instruments. UV-Vis experiments were performed on a Persee TU-1901 spectrometer. Fluorescent experiments were recorded on an Edinburgh FLS-980 spectrometer.

**Job's method.** Series of the solutions of host **P5N** and solution of guest **FI** were prepared in THF/H<sub>2</sub>O (3:2). The volume of the host and guest solutions varied from 1:9 to 9:1, respectively, with the total concentration of the host and guest being constant. The solutions were used without further stirring. The absorbance *A* of the complexation systems was measured at the maximum absorbance wavelength of the complex. The absorbance values were used to plot a diagram from which maximum the structures of the complexes were deduced.

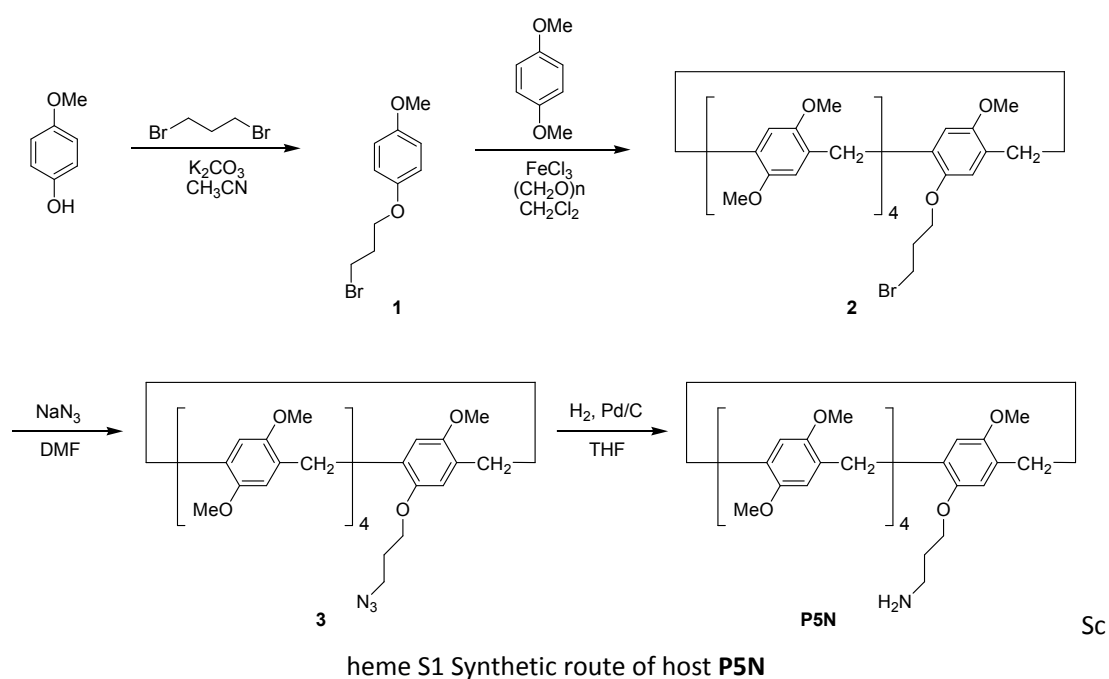

**Compound 1.** To the solution of 4-methoxyphenol (15.3 g, 0.121 mol) in acetonitrile (300 ml) was

added 1,3-dibromopropane (59.9 ml, 0.605 mol) and potassium carbonate (52.6 g, 0.363 mol) under nitrogen atmosphere. The reaction mixture was stirred under reflux for 16 h. After cooling to r.t., the mixture was evaporated under vacuum and dissolved with dichloromethane. The organic phase was washed with water and dried over anhydrous  $\text{Na}_2\text{SO}_4$ . The solution was evaporated under vacuum, and the residue was purified by column chromatography (petroleum ether: dichloromethane, 2:1) to give **1** as yellow liquid (27.0 g, 92%).  $^1\text{H}$  NMR (400 MHz,  $\text{CDCl}_3$ ):  $\delta$  6.85 (d, 4H), 4.05 (t, 2H), 3.77 (s, 3H), 3.61 (t, 2H), 2.29 (t, 2H).

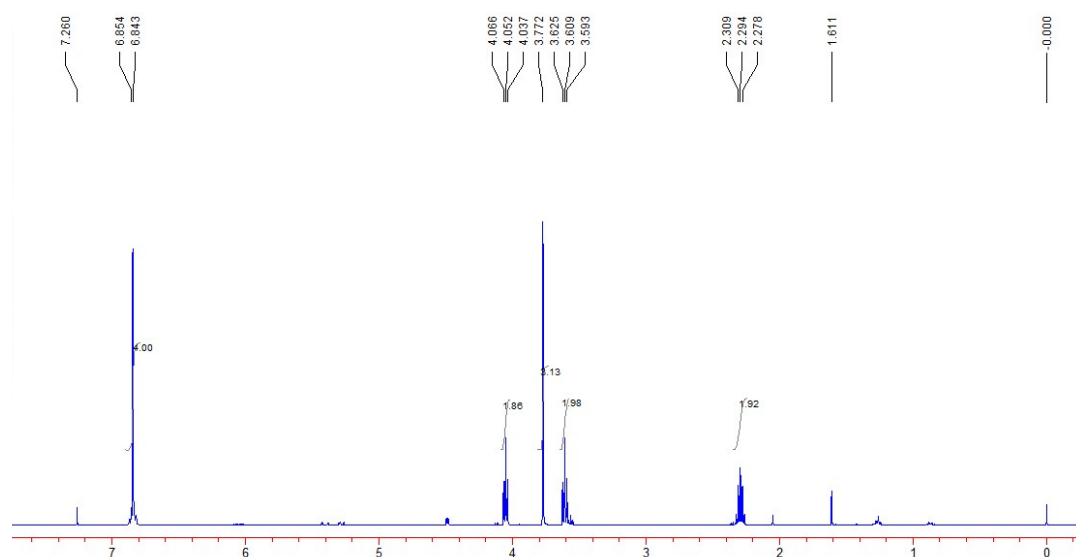

Fig. S1  $^1\text{H}$  NMR of compound **1**.

**Compound 2.** To the solution of **1** (10.0 g, 40.8 mmol) in dichloromethane (700 ml) was added

1,4-dimethoxybenzene (34.1 g, 245 mmol) and paraformaldehyde (28.9 g, 960 mmol) under nitrogen atmosphere. FeCl<sub>3</sub> (6.57 g, 40.5 mmol) was added to the solution, and the mixture was stirred at r.t. for 2 h and poured into water. After filtration, the organic phase was washed with water and dried over anhydrous Na<sub>2</sub>SO<sub>4</sub>. After evaporation under vacuum, the residue was purified by column chromatography (petroleum ether: dichloromethane, 2:1) to give **2** as white solid (3.5 g, 10%). <sup>1</sup>H NMR (400 MHz, CDCl<sub>3</sub>): δ 6.80-6.82 (m, 9H), 6.70 (s, 1H), 3.96 (t, 2H), 3.78 (m, 10H), 3.67-3.69 (m, 27H), 3.53 (t, 2H), 2.21 (t, 2H). MS (ESI): m/z 877.3 (M+Na<sup>+</sup>).

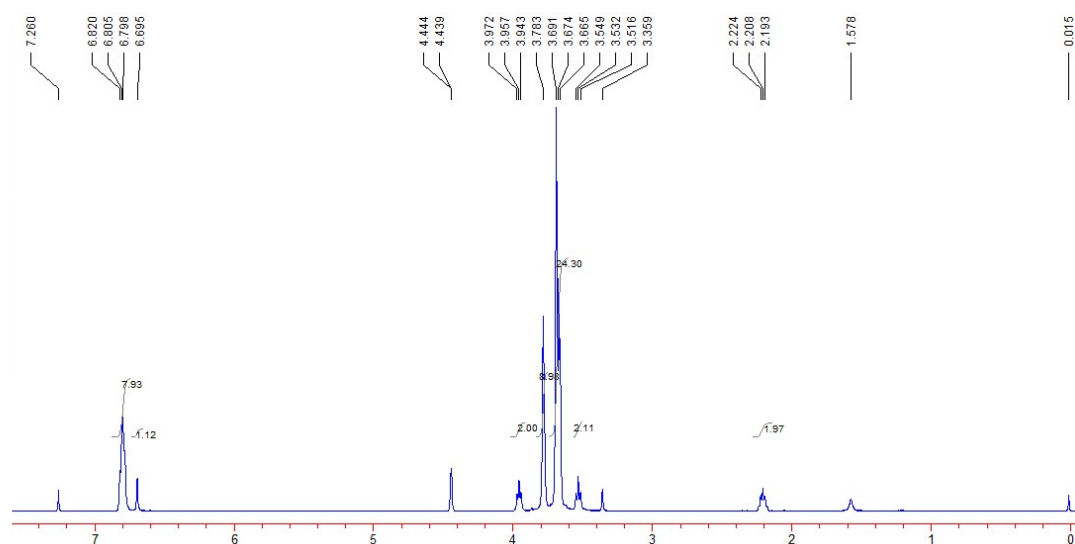

20150630-yx-1807B\_150624152316 #44-55 RT: 0.43-0.54 AV: 12 SB: 24 0.05-0.28 NL: 3.70E5  
T: ITMS + c ESI: sid=35.00 Full ms [50.00-2000.00]

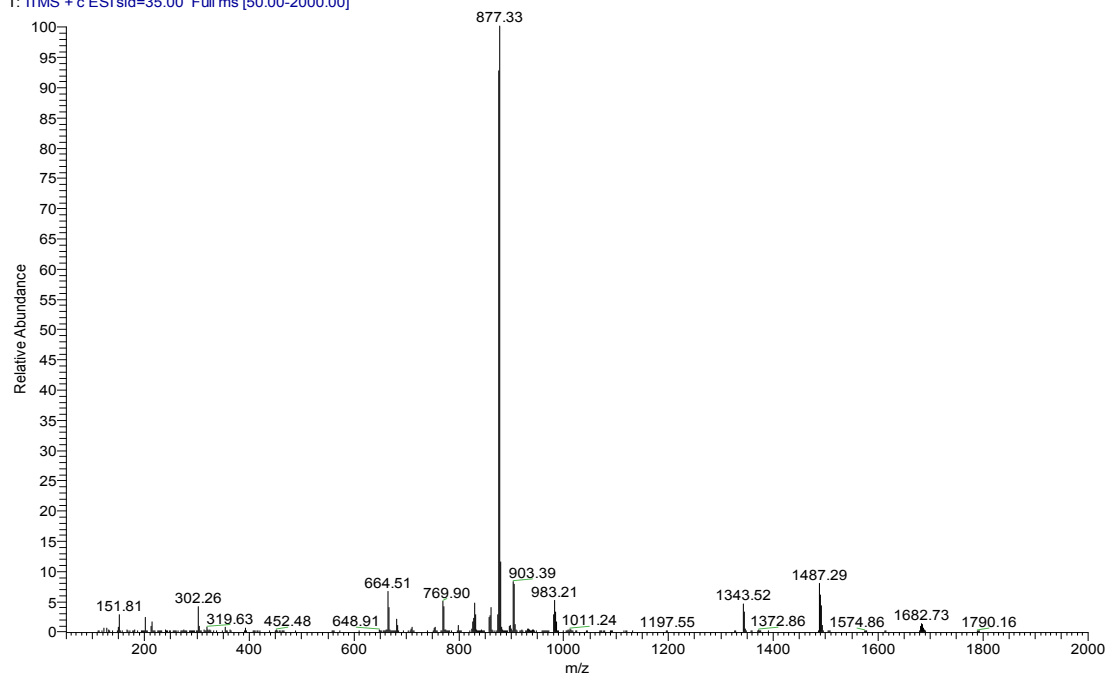

Fig. S2 <sup>1</sup>H NMR and MS of compound **2**.

**Compound 3.** To the solution of **2** (7.5 g, 8.7 mmol) in DMF (300 ml) was added sodium azide (5.1

g, 78 mmol). The reaction mixture was stirred at 100 °C for 5 h. After cooling to r.t., the mixture was poured into water (150 ml) and extracted with dichloromethane. The organic phase was washed with water and dried over anhydrous Na<sub>2</sub>SO<sub>4</sub>. After evaporation under vacuum, the residue was purified by column chromatography (petroleum ether: dichloromethane, 2/1) to give **3** as white solid (7.0 g, 97.2%). <sup>1</sup>H NMR (400 MHz, CDCl<sub>3</sub>): δ 6.76-6.82 (m, 9H), 6.70 (s, 1H), 3.91 (t, 2H), 3.77 (m, 10H), 3.62-3.69 (m, 27H), 3.43 (t, 2H), 1.97 (t, 2H). MS (ESI): m/z 837.7 (M+NH<sub>4</sub><sup>+</sup>), 842.7 (M+Na<sup>+</sup>).

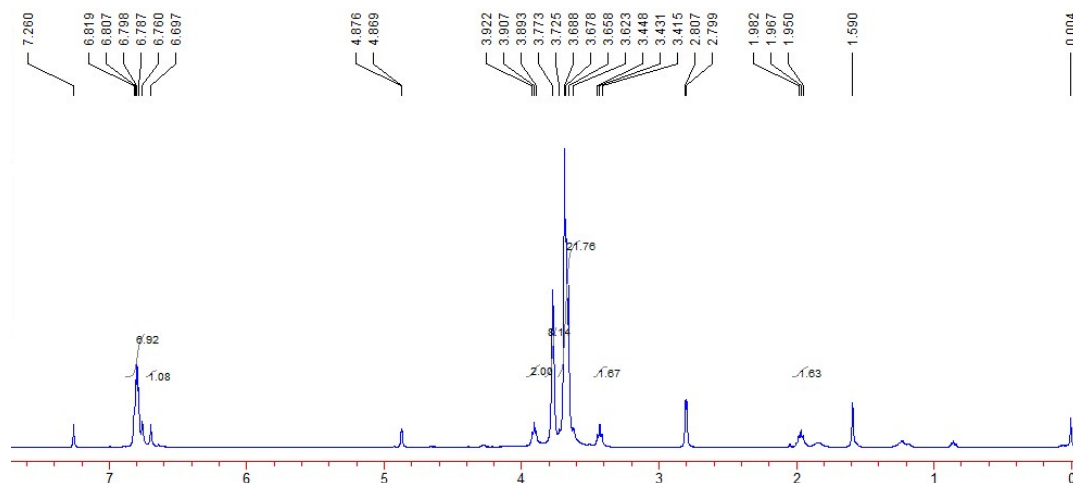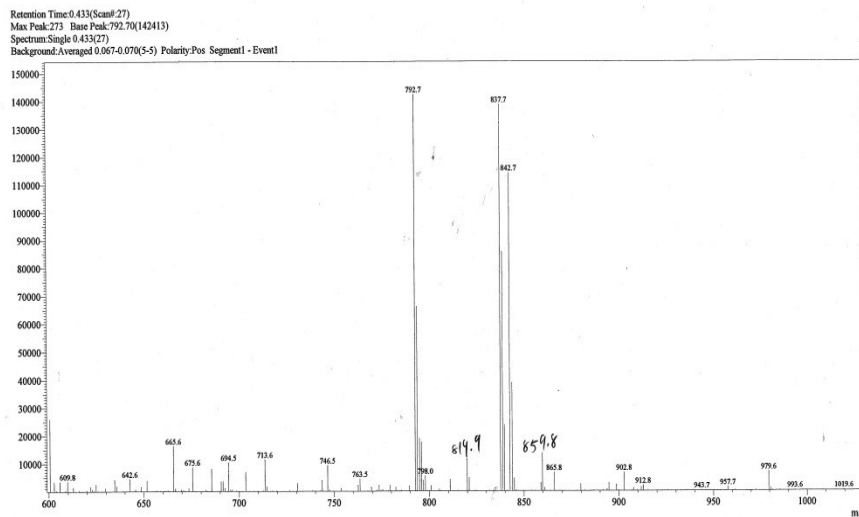

D:\DATA\wuyk-group\Y3-II-001.

Fig. S3 <sup>1</sup>H NMR and MS of compound **3**.

**Host P5N.** A suspension of **3** (5.0 g, 6.1 mmol) and Pd/C (10%, 1.0 g) in THF (200 ml) was stirred

at °C under hydrogen atmosphere (75 psi) for 26 h. The reaction mixture was filtered, and the filtrate was evaporated under vacuum. The residue was purified by column chromatography (dichloromethane: methane, 50/1) to give **4** as white solid (4.3 g, 89%).  $^1\text{H NMR}$  (400 MHz,  $\text{CDCl}_3$ ):  $\delta$  6.69-6.80 (m, 10H), 3.86 (m, 2H), 3.77 (m, 10H), 3.64-3.66 (m, 27H), 2.61 (m, 2H), 1.68 (m, 2H).  $^{13}\text{C NMR}$  (400 MHz,  $\text{CDCl}_3$ ):  $\delta$  151, 150, 128, 115, 114, 66, 56, 38, 35, 30. MS (ESI):  $m/z$  796.7 ( $\text{M}+\text{H}^+$ ).

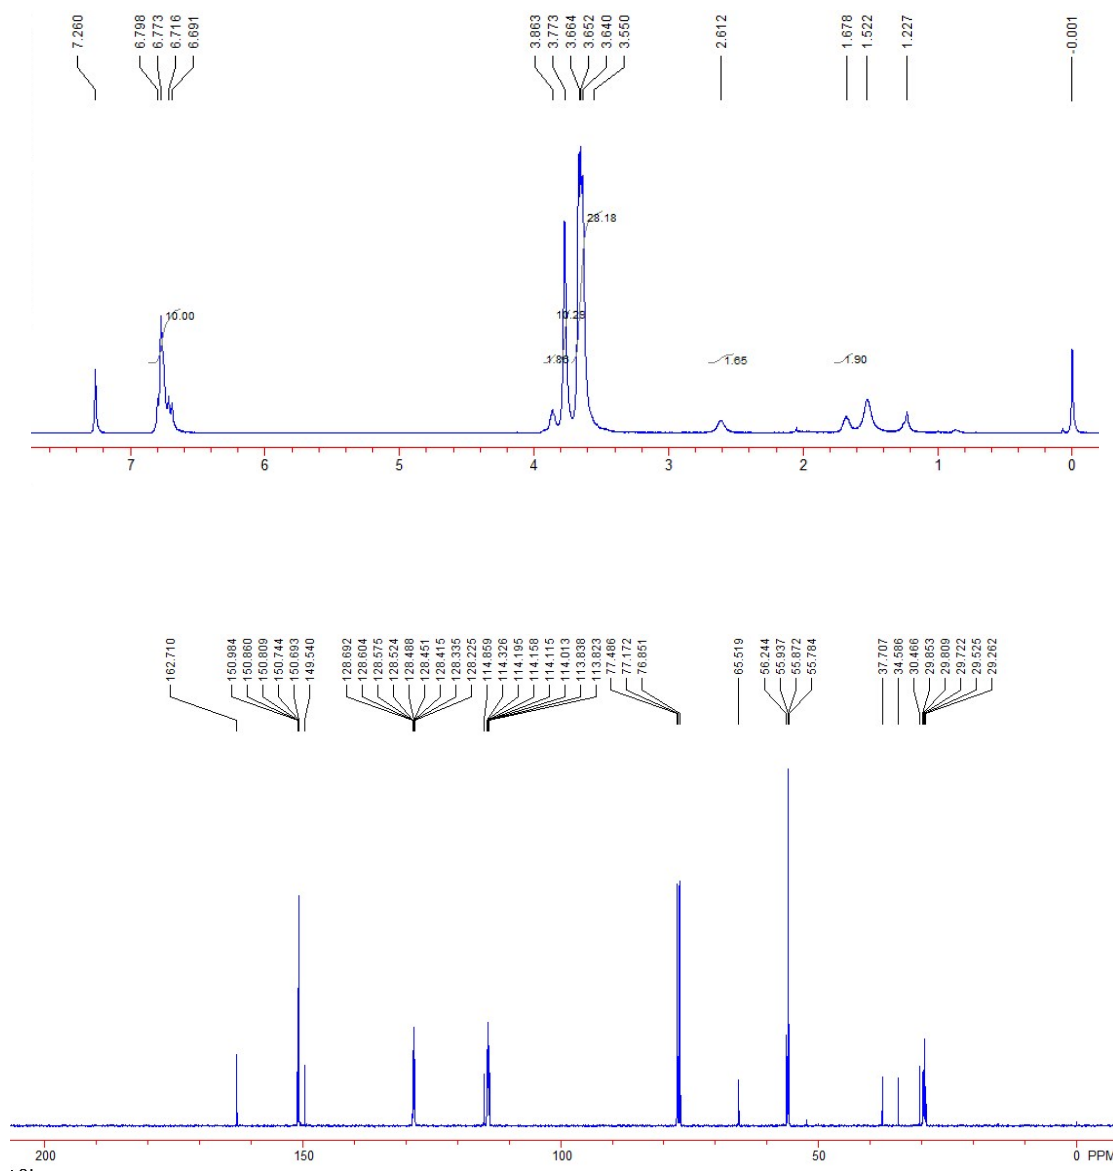

YCX-1404F\_160616145103 #250-332 RT: 2.33-3.10 AV: 83 NL: 1.39E6  
T: ITMS + c ESI Full ms [150.00-2000.00]

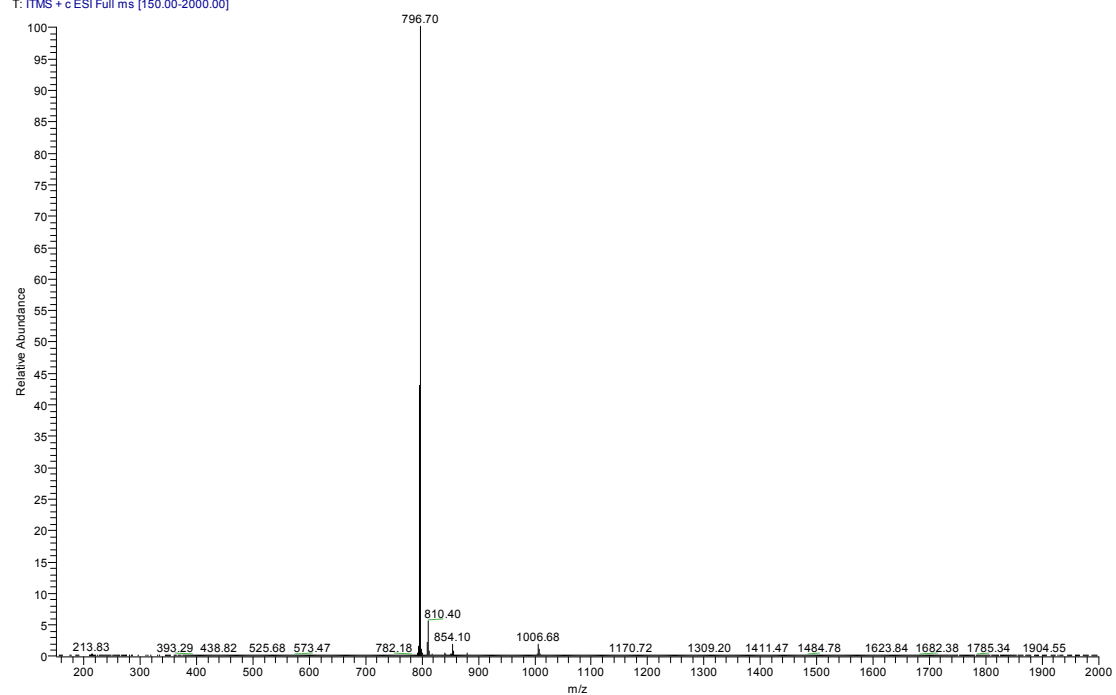

Fig. S4  $^1\text{H}$  NMR,  $^{13}\text{C}$  NMR and MS of host P5N.

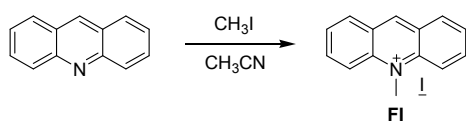

**Fluorescent indicator FI.** To the solution of acridine (2.06 g, 11 mmol) in acetonitrile (100 ml) was added methyl iodide (5.0 g, 33 mmol). The reaction mixture was stirred under reflux for 24 h. After evaporation under vacuum, the residue was washed with THF and filtered to give **FI** as red solid (1.50 g, 70%).  $^1\text{H NMR}$  (400 MHz, DMSO):  $\delta$  10.21 (s, 1H), 8.79 (d, 2H), 8.64 (d, 2H), 8.47 (t, 2H), 8.04 (t, 2H), 4.86 (s, 3H).

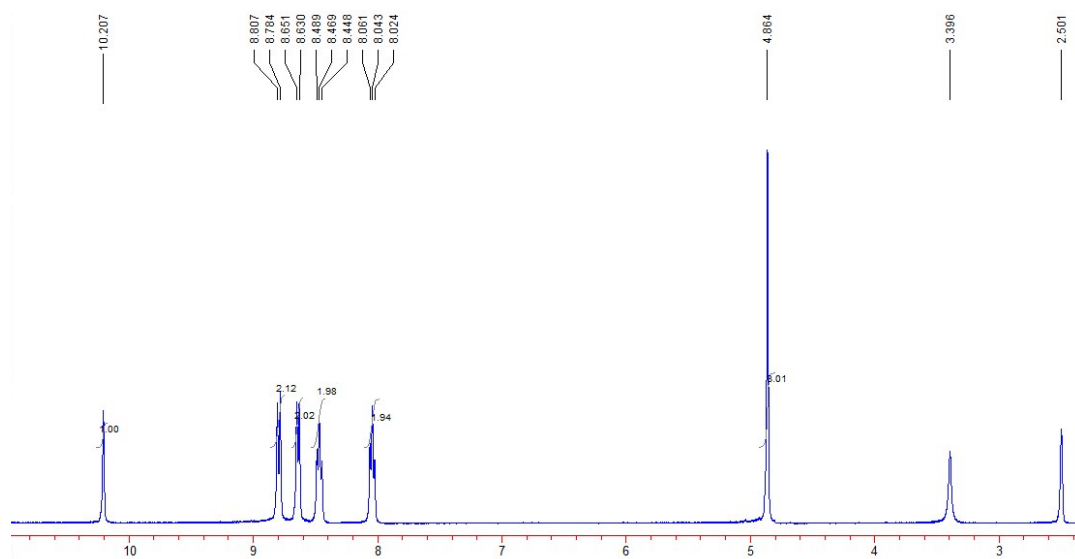

Fig. S5  $^1\text{H NMR}$  of fluorescence indicator FI.



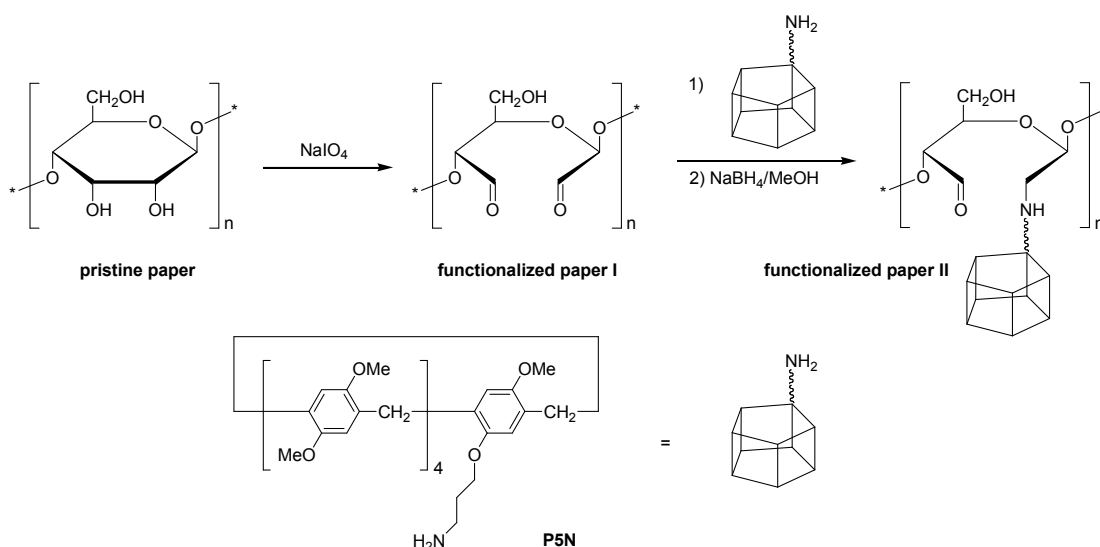

### Preparation of Pillararene-functionalized paper

The cellulose paper ( $1 \times 2 \text{ cm}^2$ ) was washed sequentially with THF, acetone and water, each time for 5 min by ultrasonication. The rinsed paper was immersed into the solution of sodium periodate (0.470 g) in water (20 ml). The mixture was kept in the dark at  $40 \text{ }^\circ\text{C}$  for 5 h. Ethylene glycol (2 ml) was added and continued for 1 h. The paper was separated from the solution and washed three times with water, each time for 5 min by ultrasonication. Then the functionalized paper I was dried under vacuum and stored under argon.

The functionalized paper I was immersed into the solution of **P5N** (0.784 g) in THF (10 ml), catalyzed by  $4 \text{ \AA}$  molecular sieve under argon. The mixture was kept at  $50 \text{ }^\circ\text{C}$  for 10 h. The paper was separated from the solution and washed three times with THF, methanol, respectively, each time for 5 min by ultrasonication. The rinsed paper was immersed into the solution of sodium borohydride (0.178 g) in methanol (10 ml). The mixture was kept at r.t. for 1 h. The paper was separated from the solution and washed three times with methanol, each time for 5 min by ultrasonication. Then the functionalized paper II was dried under vacuum and stored under argon.

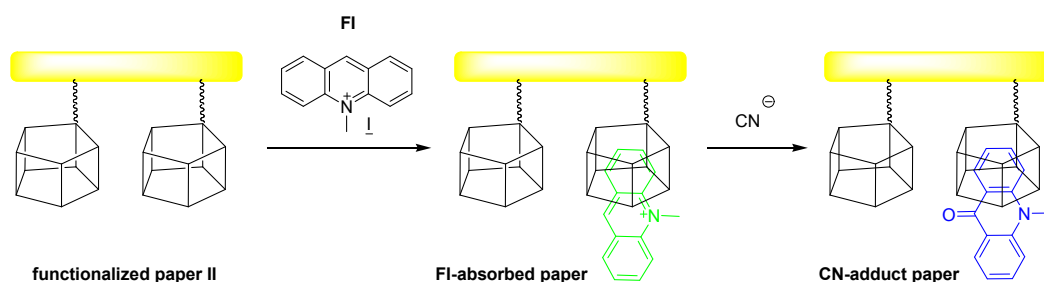

### Preparation of FI-absorbed paper

The functionalized paper II was immersed into the solution of **FI** (0.05 M) in water. The mixture was kept at r.t. for 5 h. The paper was separated from the solution and washed three times with water, each time for 5 min by ultrasonication. Then the functionalized paper II was dried under vacuum and stored under argon.

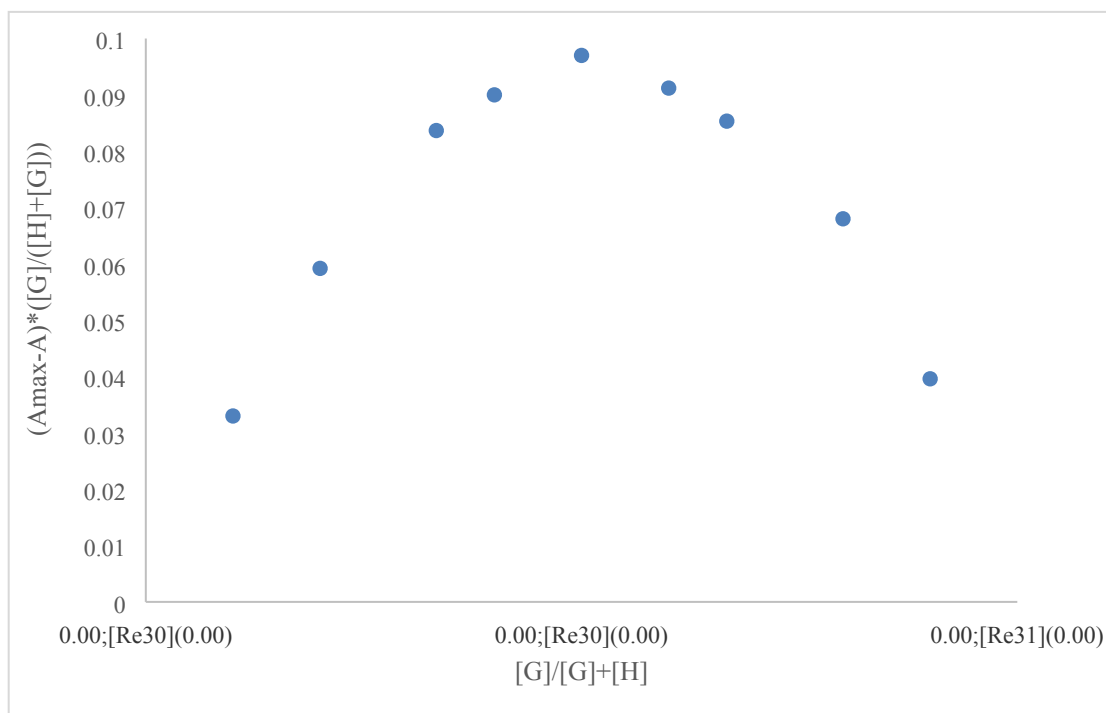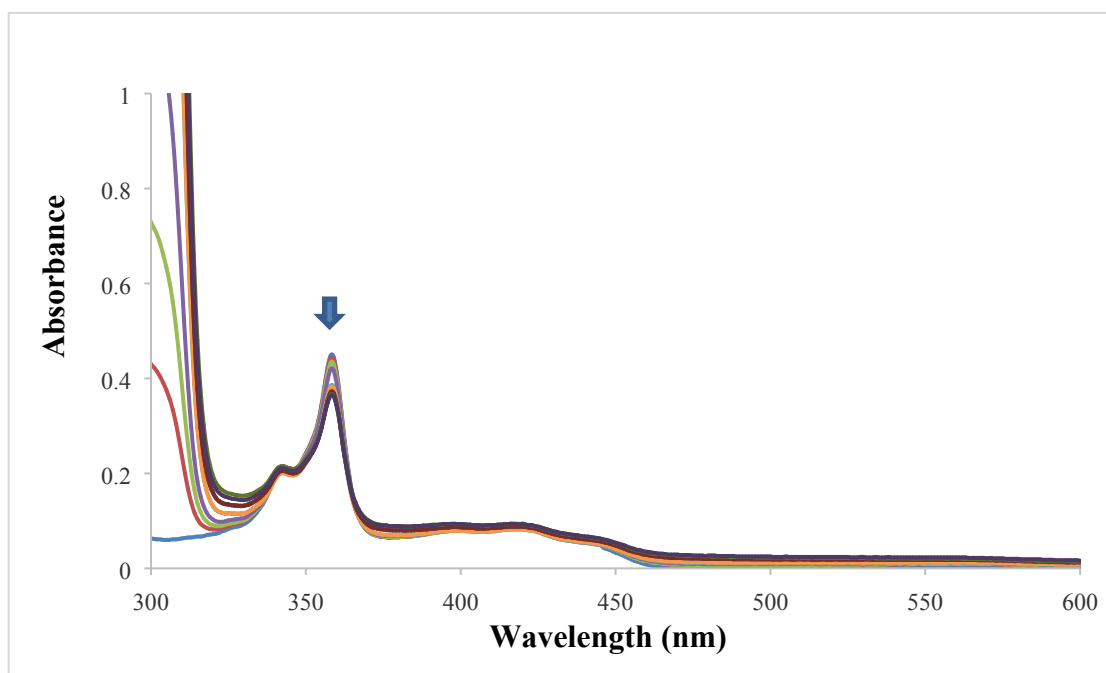

Fig. S6 Job's plot for the complexation between FI and P5N (upper) at the wavelength of 360 nm. UV-Vis titration of FI (0.02 mM in THF/H<sub>2</sub>O, 2:3 at 298 K) with the increment of P5N: a) 0.0 equiv., b) 0.5 equiv., c) 1.0 equiv., d) 1.5 equiv., e) 2.0 equiv., f) 3.0 equiv., g) 4.0 equiv., h) 5.0 equiv., i) 7.0 equiv., j) 10.0 equiv. (lower).

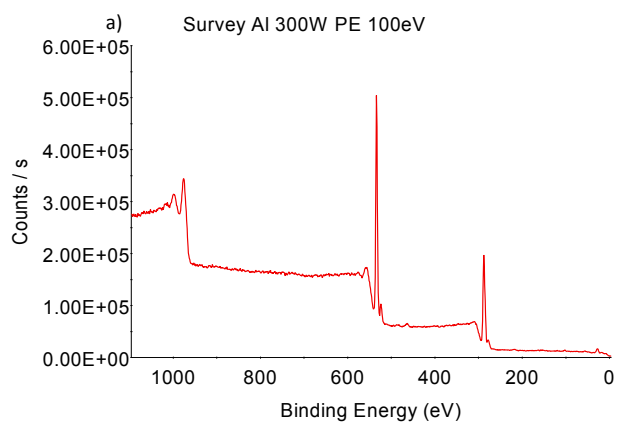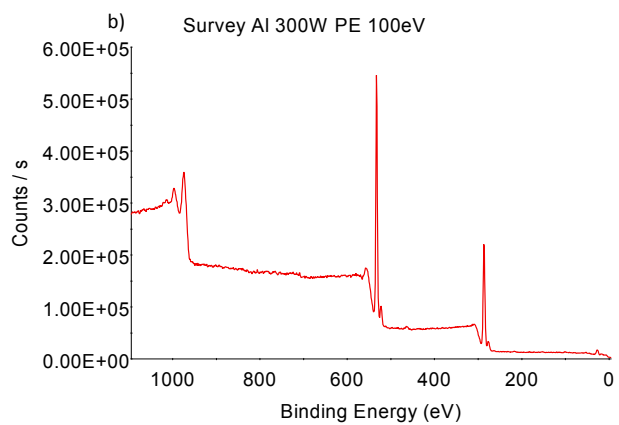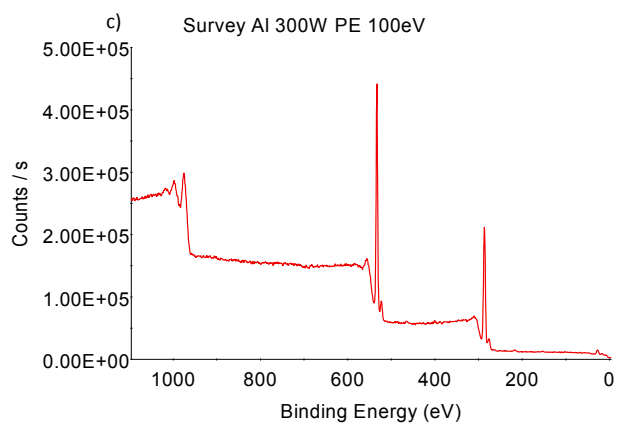

Fig. S7 XPS spectra of a) pristine paper, b) functionalized paper I, c) functionalized paper II.

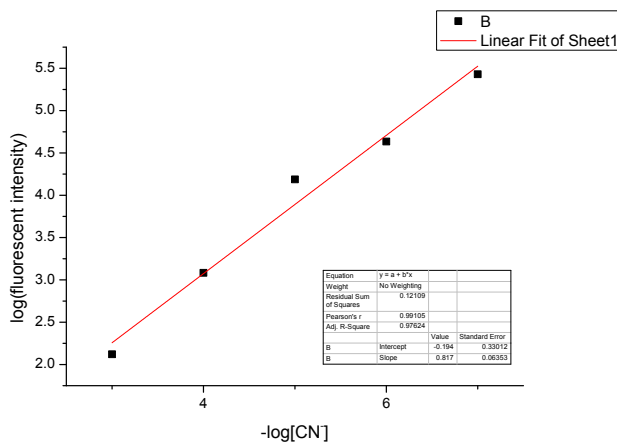

Fig. S8 Plot of the fluorescence intensities as a function of concentrations of cyanide ion.

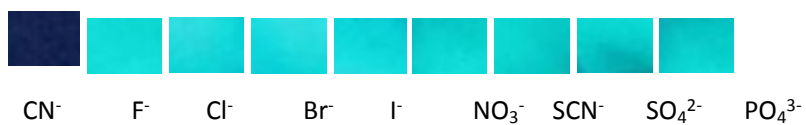

Fig. S9 Functionalized paper upon immersion in a series of anions (0.1 mM).

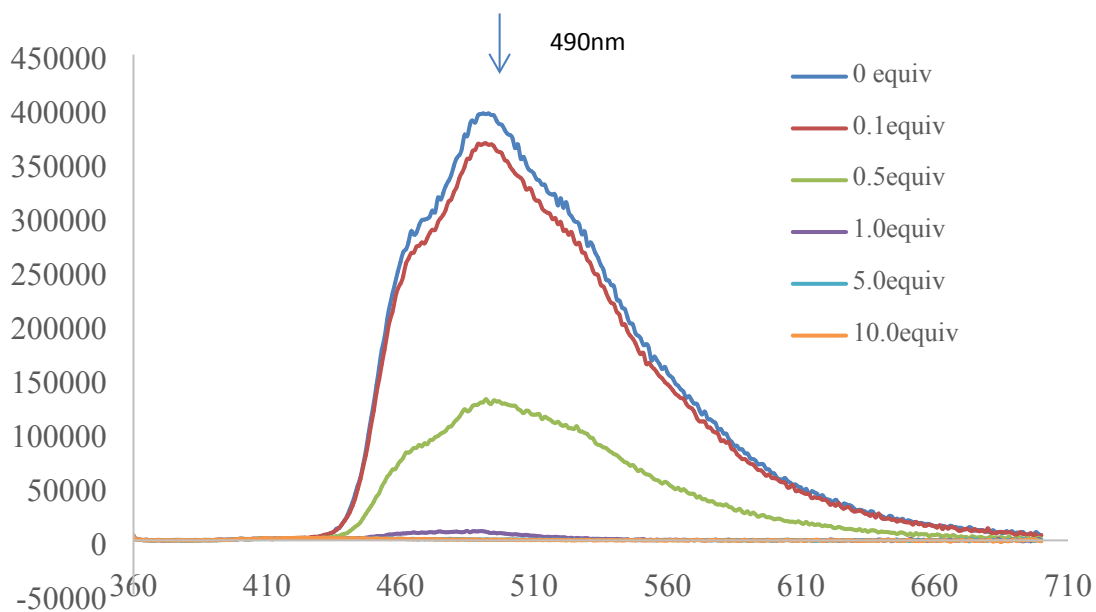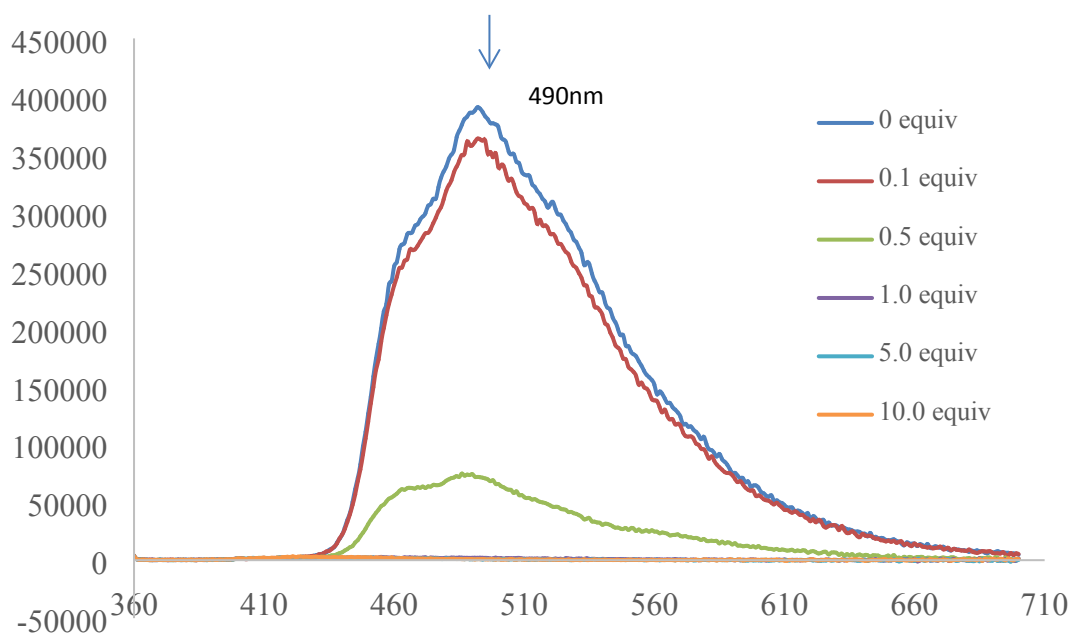

Fig. S10 Fluorescence emission of FI (upper) and 1:1 mixture of P5N and FI (lower) in aqueous solution with increment of cyanide ion at the wavelength of 490 nm.
